# Supplementary material for: Synergetic effects of electrochemical oxidation of Spiro-OMeTAD and Li+ ion migration for improving the performance of n–i–p type perovskite solar cells
Source: Royal Society of Chemistry journal article supplement (doi:10.1039/d0ta12458c), 2021-01-01
Supplement: d0ta12458c1.pdf [file d0ta12458c1.pdf]

## Supporting Information

### Synergetic Effects of Electrochemical Oxidation of Spiro-OMeTAD and Li<sup>+</sup> Migration in Improving the Performance of n-i-p Type Perovskite Solar Cells

Changzeng Ding, Rong Huang, Christian Ahläng, Jian Lin, Lianping Zhang, Dongyu Zhang, Qun Luo, Fangsen Li, Ronald Österbacka,\* Chang-Qi Ma \*

#### 1. proposed oxidation mechanism reported in the literature:

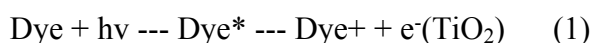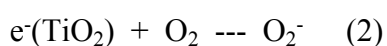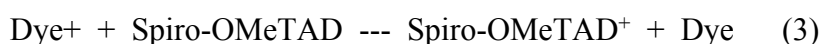

**Scheme S1.** proposed oxidation mechanism of Spiro-OMeTAD in solid state dye sensitized solar cells.<sup>1</sup>

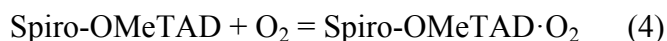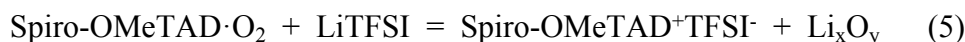

**Scheme S2.** proposed oxidation mechanism of Spiro-OMeTAD by Snaith et al.<sup>2</sup>

Light Wavelength: 380-450nm

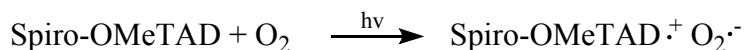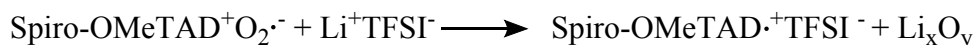

Light Wavelength: >450nm

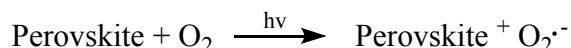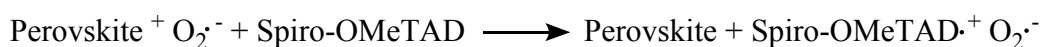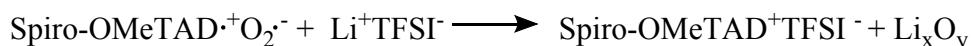

**Scheme S3.** proposed oxidation mechanism of Spiro-OMeTAD by Meng et al.<sup>3</sup>

**Figure S1.** Statistical graph of changes in device performance and subsequent oxidation treatment time with fresh devices.(a) Voc, (b), Jsc, (c) FF, (d) PCE.

**Figure S2** Comparison of the current density-voltage (J-V) curves of the same cell as shown in Figure 1b (a) and Figure 1c (b) with multiple scan.

**Figure S3.** The time-dependent curves of device performance parameters under different oxidation conditions (a) Voc (b) Jsc (c) FF (d) PCE

**Figure S4.** UV-Vis absorption spectra of (a). Glass/Spiro-OMeTAD (50% Li-TFSI:*t*-BP); (b). Glass/Spiro-OMeTAD (50% Li-TFSI:*t*-BP)/Ag;(c) Glass/SnO<sub>2</sub>/Spiro-OMeTAD (50% Li-TFSI:*t*-BP) films exposure in 30%RH air for different times. (d). Comparison of absorbance changes of the Spiro-OMeTAD films with or without SnO<sub>2</sub> layer.

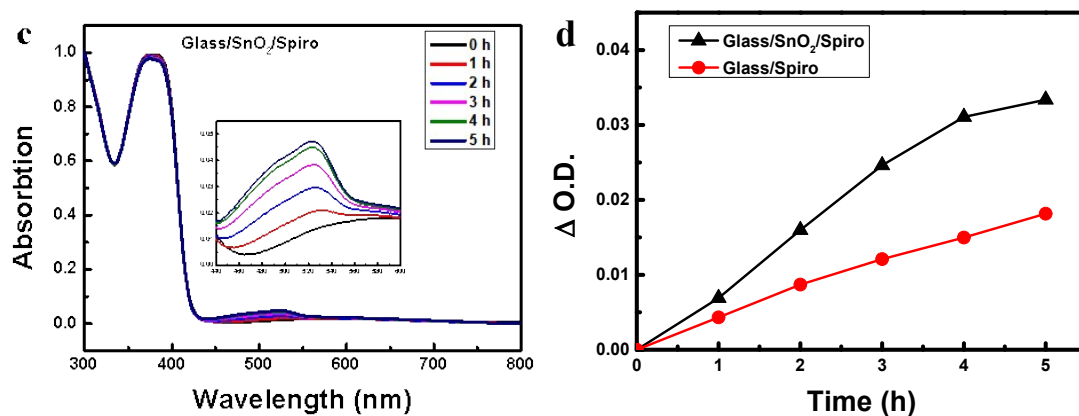

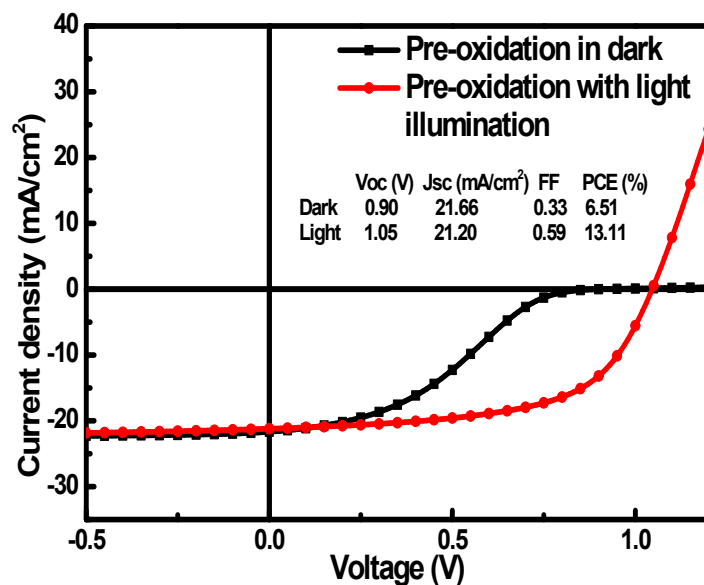

**Figure S5.** Current density-voltage (J-V) curves of Pre-oxidation cells in the dark and with light illumination.

**Figure S6.** Statistical graph of changes in device performance and subsequent oxidation treatment time after pre-oxidation .(a) Voc, (b), Jsc, (c) FF, (d) PCE.

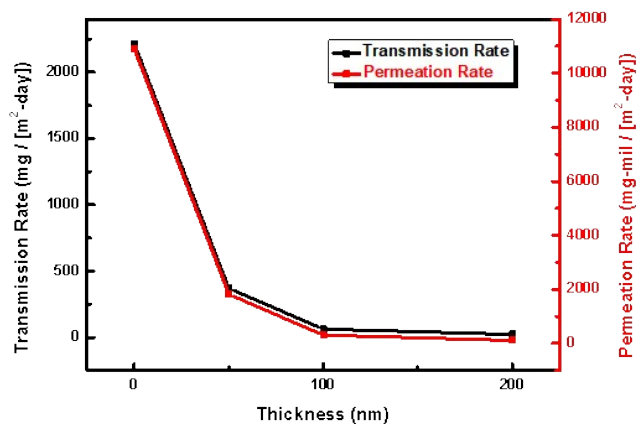

**Figure S7.** water vapor transmission rate (WVTR) of PET (125  $\mu\text{m}$ )/Ag (x nm) film tested at 100%RH atmosphere

**Figure S8** The variation of performance of devices with different thickness of Ag electrode

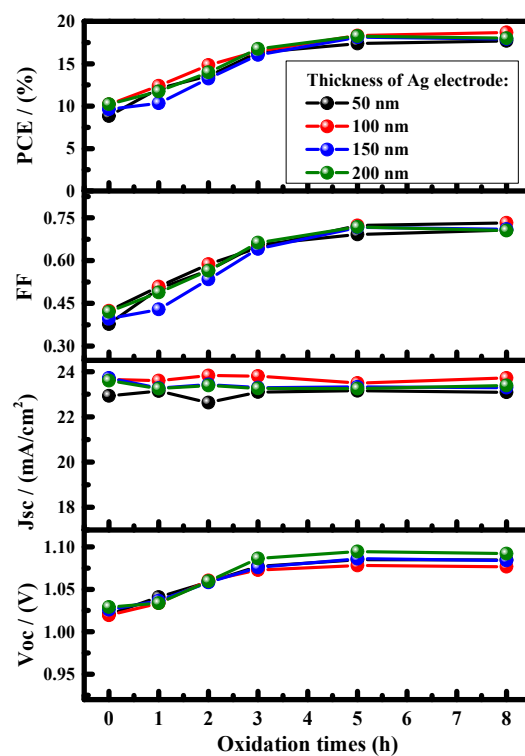

during oxidation process. Note that all the devices were pre-oxidized for 5 h in air with control RH of 30% in the dark.

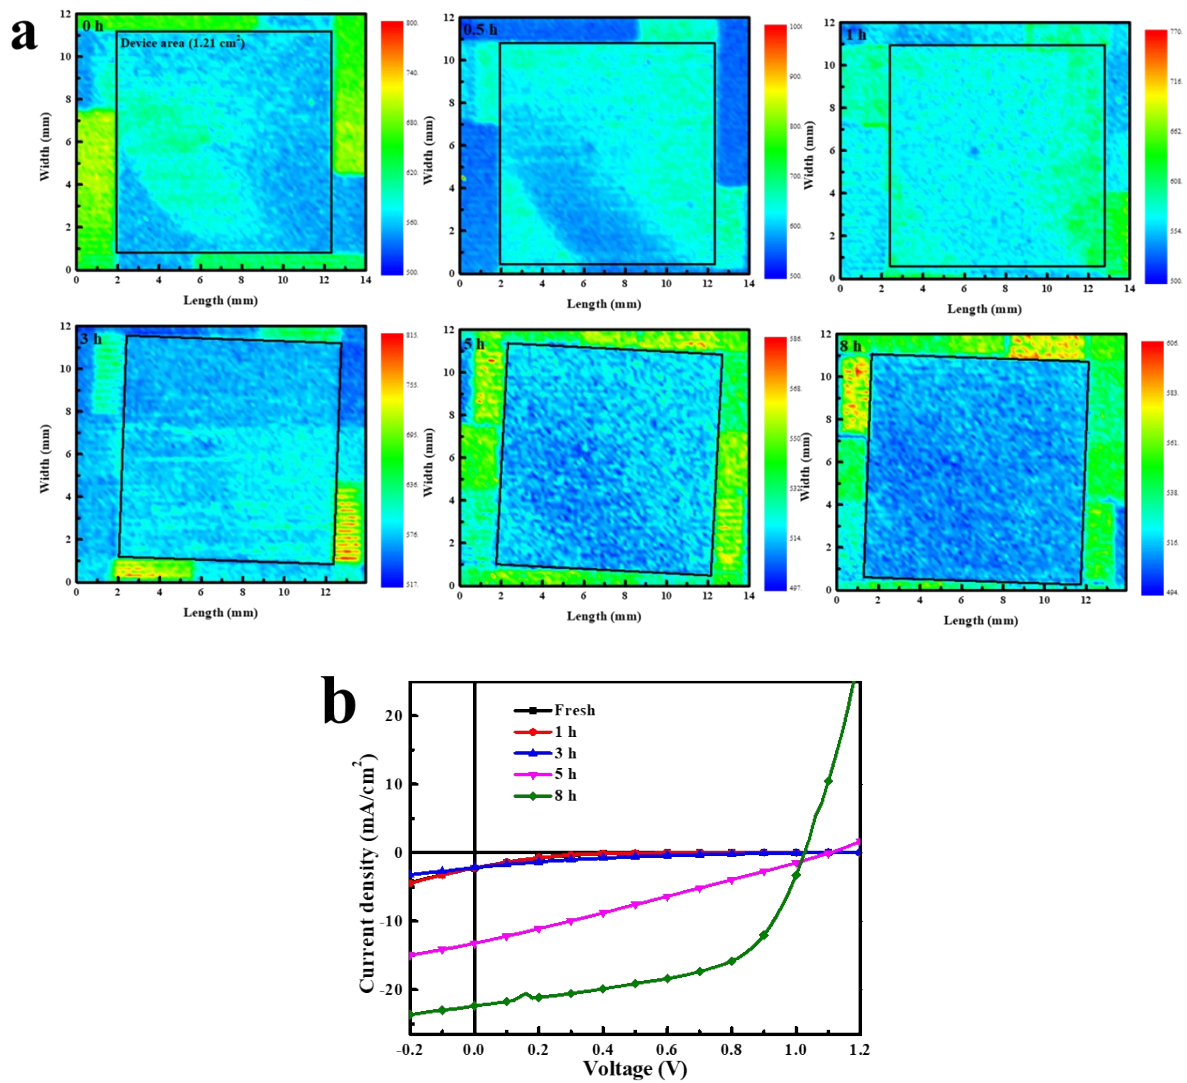

**Figure S9.** (a) PL-mapping of perovskite solar cells during the oxidation process in 30% RH air atmosphere, and the active area of solar cell is  $1.21 \text{ cm}^2$ . (b) J-V characteristics of the cell upon oxidation are also included.

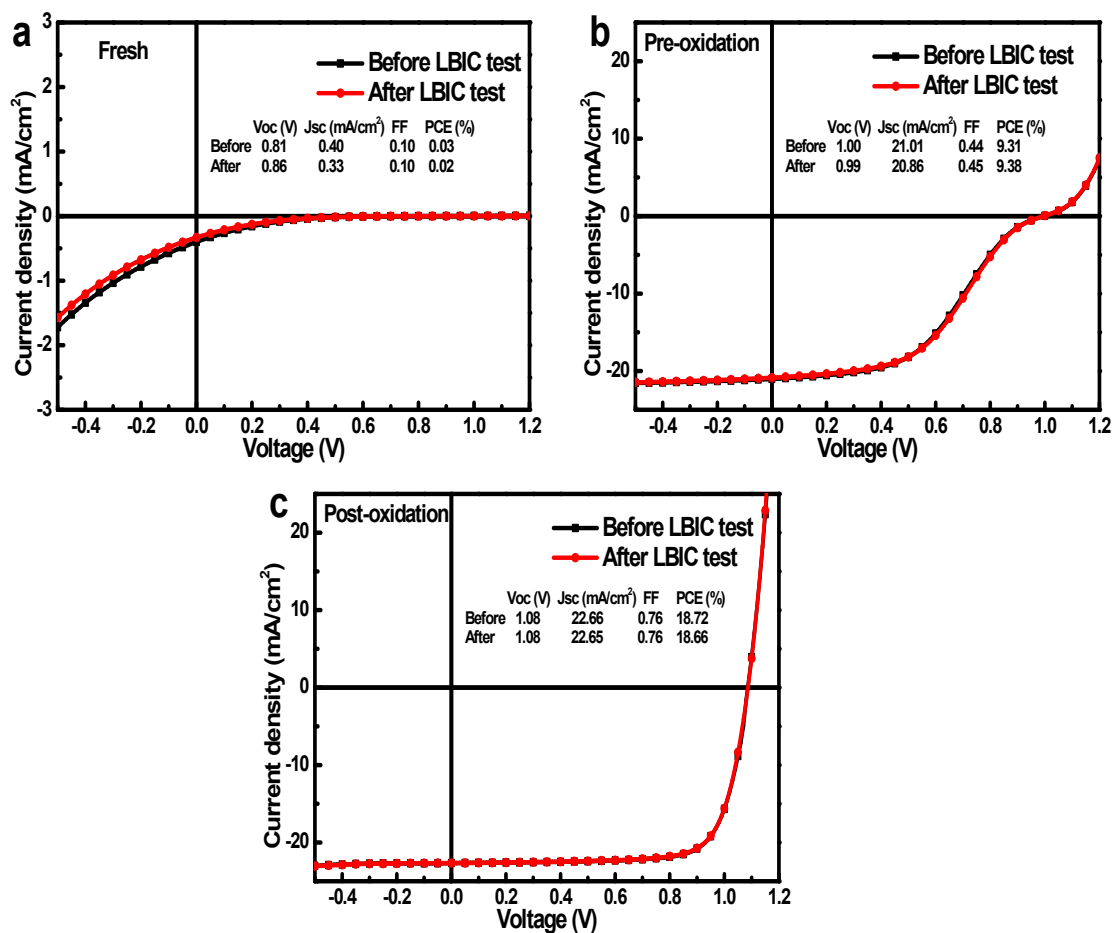

**Figure S10** Current density-voltage (J-V) curves before and after LBIC test under different oxidation conditions a) Fresh, b) Pre-oxidation, c) Post-oxidation.

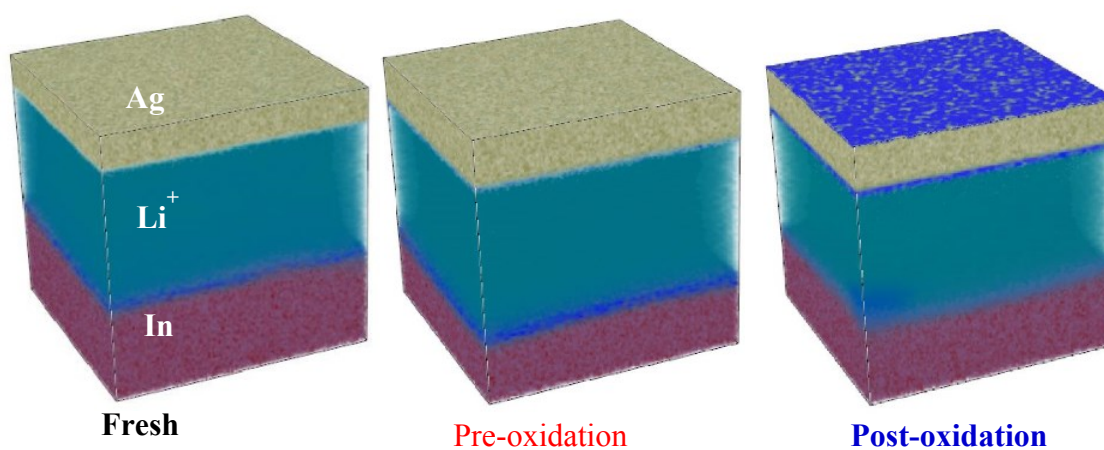

**Figure S11.** the distribution of Li<sup>+</sup> in ITO/Spiro/Ag films before and after oxidation in 3D configuration

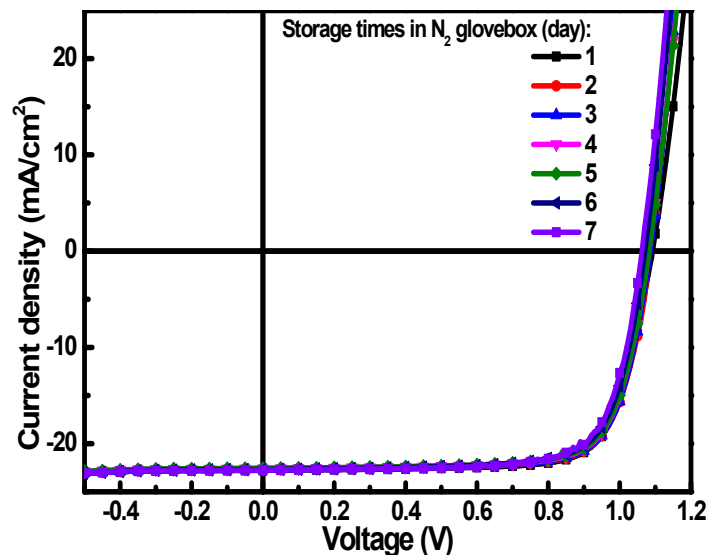

**Figure S12.** The evolution of J-V curves within a week for the optimized cell storage in dark in glove box.

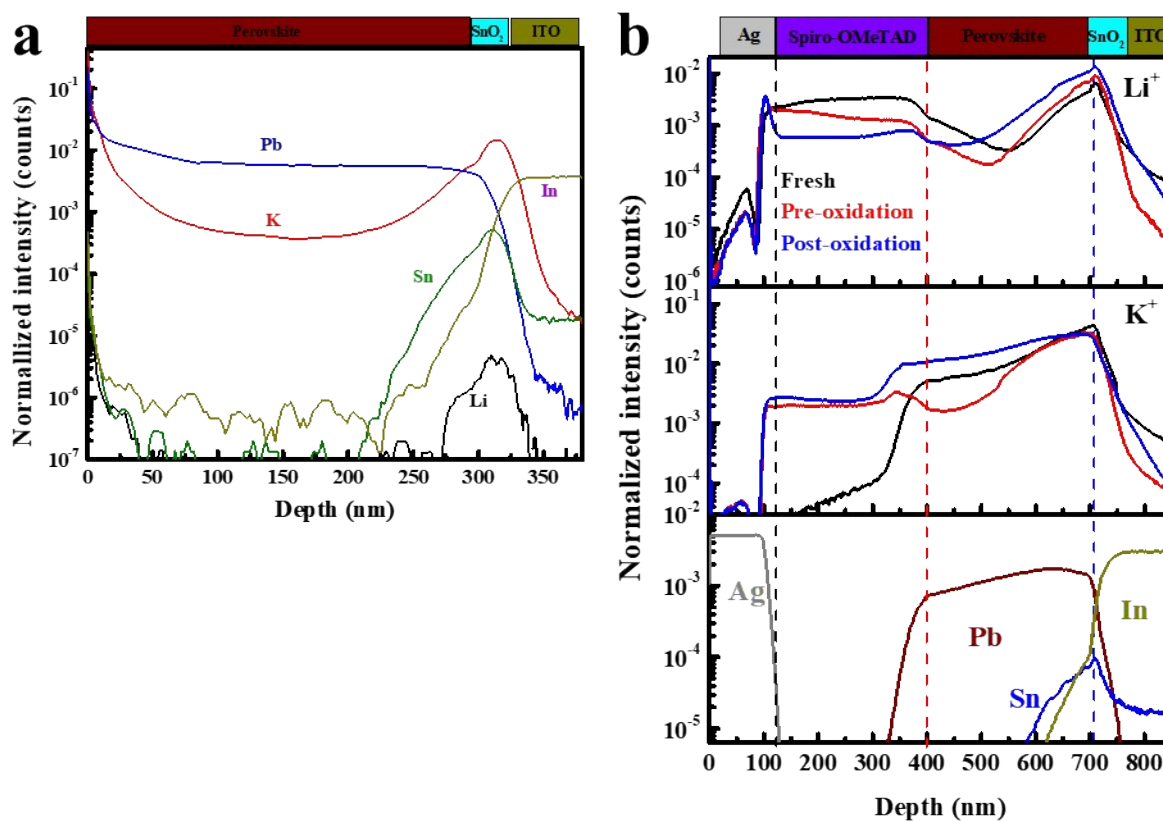

**Figure S13.** TOF-SIMS results of (a) Glass/ITO/SnO<sub>2</sub>/PVSK and (b) diffusion of Li<sup>+</sup> and K<sup>+</sup> of the perovskite solar cell upon pre- and post-oxidation process.



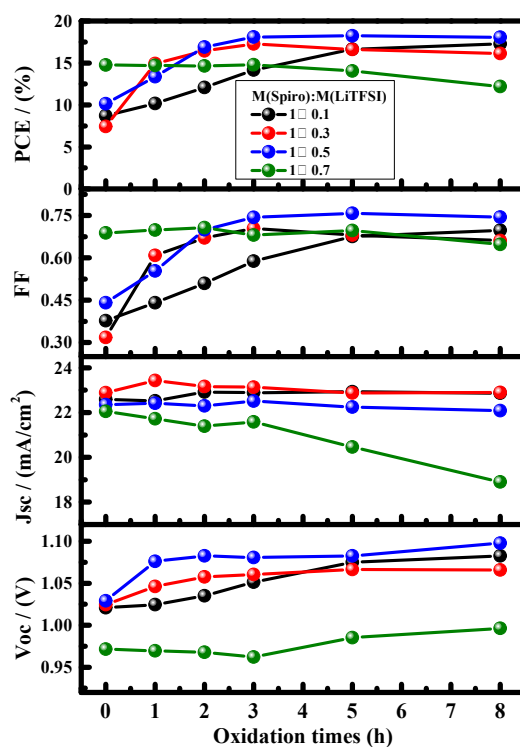

**Figure S14** The variation of performance of devices doped with different concentrations of LiTFSI with oxidation time. Note that all the devices were pre-oxidized for 5 h in air with control RH of 30% in the dark.

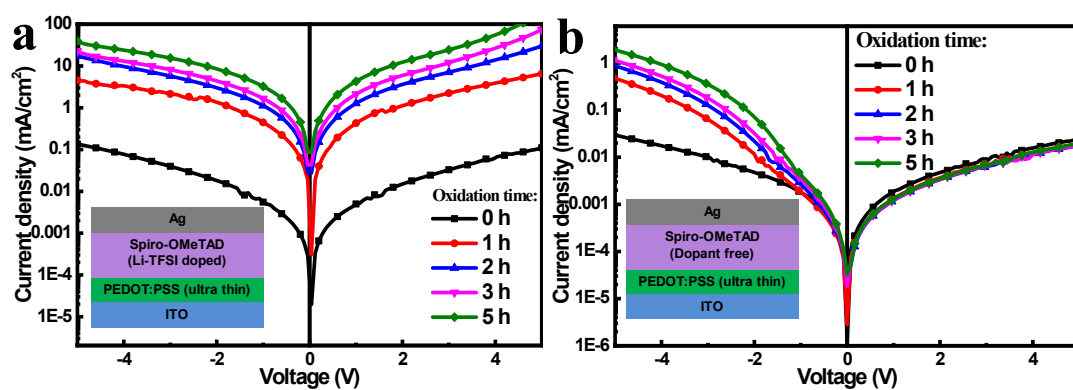

**Figure S15.**  $J-V$  curves of the dopant-free (a) and 50% LiTFSI-doped (b) Spiro-OMeTAD based hole only device upon different oxidation conditions.

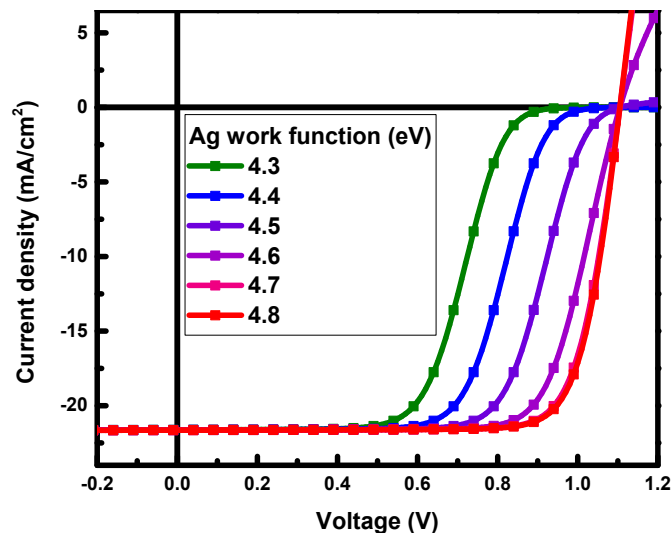

**Figure S16.** shows the effect of a change in the Ag work function, assuming that the doping concentration in the Spiro-OMeTAD layer is  $3 \times 10^{18} \text{ cm}^{-3}$  and that the  $\text{SnO}_2$  layer is ideal. Assuming that the Ag work function has a work function of 4.3 eV when it is fresh and goes down to 4.8 eV or lower upon oxidation, this could be the origin of the observed s-shapes.

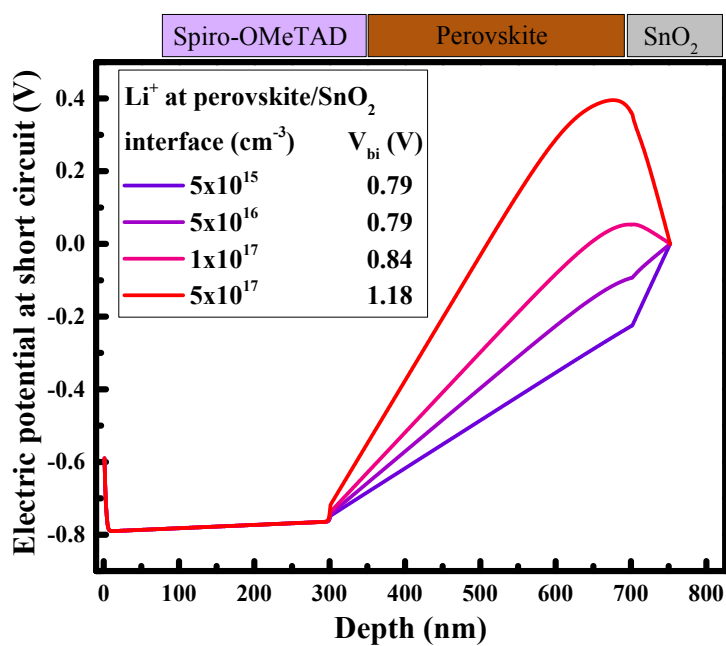

**Figure S17** Electrical potential at short circuit for the simulation data show in Figure 4 (e). The built-in potential is estimated as the maximum potential difference for each curve.

**Table S1.** shows the parameters used in the drift-diffusion simulations. For the ideal SnO<sub>2</sub>, we took the surface recombination velocity for holes to be 0.01 cm/s.

| Parameter                                                | Spiro-OMeTAD                 | Perovskite                             | SnO <sub>2</sub> (non-ideal) |
|----------------------------------------------------------|------------------------------|----------------------------------------|------------------------------|
| Thickness (nm)                                           | 300                          | 400                                    | 50                           |
| Electron transport level (eV)                            | 2.0                          | 3.5                                    | 3.6                          |
| Hole transport level (eV)                                | 5.0                          | 5.2                                    | 7.0                          |
| Effective density of state (cm <sup>-3</sup> )           | 10 <sup>20</sup>             | 5×10 <sup>19</sup>                     | 10 <sup>20</sup>             |
| Electron mobility (cm <sup>2</sup> /Vs)                  | -                            | 20                                     | 1                            |
| Hole mobility (cm <sup>2</sup> /Vs)                      | 5×10 <sup>-5</sup>           | 20                                     | -                            |
| Relative dielectric constant                             | 3                            | 30                                     | 10                           |
| Electron trap-assisted recombination lifetime (ns)       | 10 (at perovskite interface) | 100                                    | 1 (at perovskite interface)  |
| Hole trap-assisted recombination lifetime (ns)           | 1 (at perovskite interface)  | 10                                     | 10 (at perovskite interface) |
| Radiative recombination coefficient (cm <sup>3</sup> /s) | -                            | 10 <sup>-10</sup>                      | -                            |
| Generation rate (cm <sup>-3</sup> •s <sup>-1</sup> )     | -                            | 3.4×10 <sup>21</sup>                   | -                            |
| Injection barrier (eV)                                   | 0.3 (from Ag)                | 0.1 (from the ideal SnO <sub>2</sub> ) | 0.5 (from ITO)               |

**Table S2.** The time-resolved photoluminescence (TRPL) fitting results.

|                       | $\tau_1$ (ns) | $\tau_2$ (ns) |
|-----------------------|---------------|---------------|
| <b>Fresh</b>          | 22.62         | 53.99         |
| <b>Pre-oxidation</b>  | 7.46          | 35.46         |
| <b>Post-oxidation</b> | 4.77          | 29.86         |

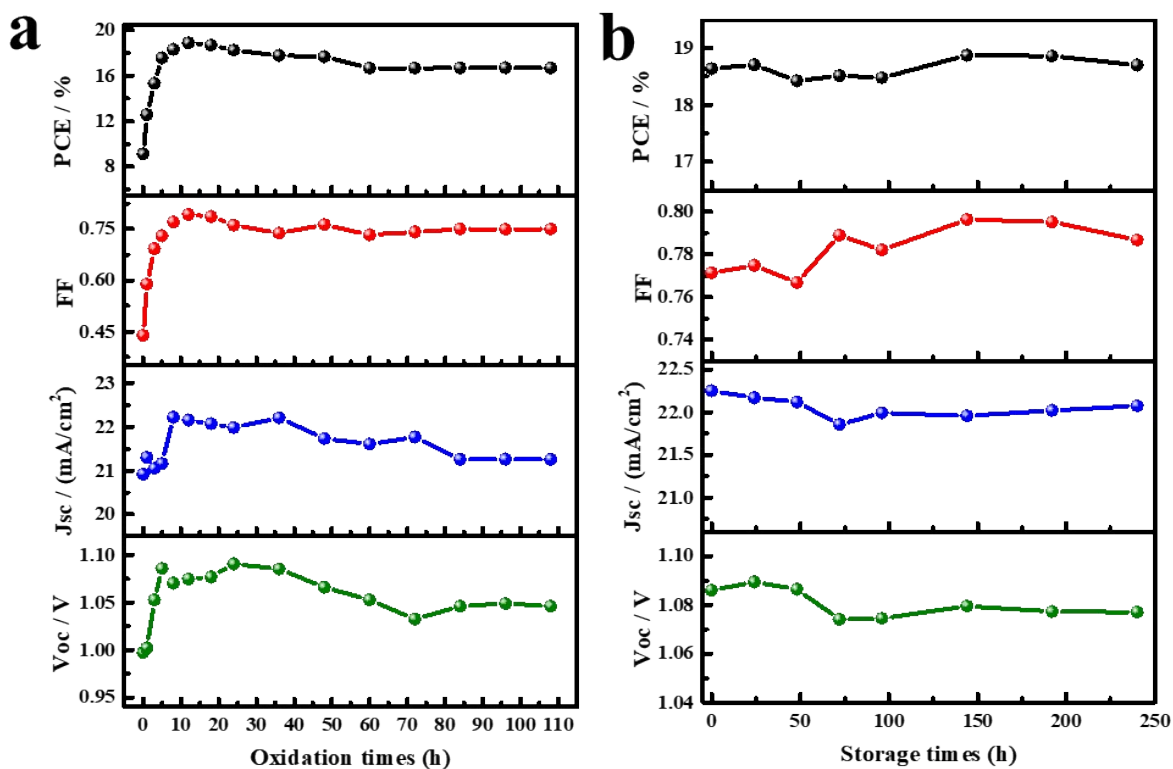

**Figure S18** The variation of performance of the solar cells (a) with different oxidation times in 30% RH ambient air. (b) storage in N<sub>2</sub> glove box after post-oxidation for 8 h.

### References:

1. U. B. Cappel, T. Daeneke and U. Bach, *Nano Lett.*, 2012, **12**, 4925–4931.
2. A. Abate, T. Leijtens, S. Pathak, J. l. Teuscher, R. Avolio, M. E. Errico, J. Kirkpatrick, J. M. Ball, P. Docampo, I. McPherson and H. J. Snaith, *Phys. Chem. Chem. Phys.*, 2013, **15**, 2572–2579.
3. S. Wang, W. Yuan and Y. S. Meng, *ACS Appl. Mater. Inter.*, 2015, **7**, 24791–24798.
